# Supplementary material for: Design and Synthesis of a Fluorescent Probe Based on Copper Complex for Selective Detection of Hydrogen Sulfide
Source: Hindawi journal article supplement (doi:10.1155/2021/8822558), 2021-01-01
Supplement: f1 [file 8822558.f1.docx]

**Supporting Information**

**Design and Synthesis of a Fluorescent Probe Based on Copper Complex for Selective Detection of Hydrogen Sulfide**

Guanglan Mao1, Chenxi Liu2, Nan Yang2, Linlin Yang2, Guangjie He2,*

1 Department of Traditional Chinese Medicine, The third Affiliated Hospital of Xinxiang Medical College, East Section of Hualan Avenue, Xinxiang, 453000, Henan Province, P. R. China

2 XinxiangKey Laboratory of Forensic Science Evidence, School of Forensic Medicine, Xinxiang Medical University, Jinsui Road No. 601, Xinxiang, 453003, Henan Province, P. R. China

Fig. S1 1H NMR spectra of probe **NA-LCX** in d6-DMSO

Fig. S2 13C NMR spectra of probe **NA-LCX** in d6-DMSO.


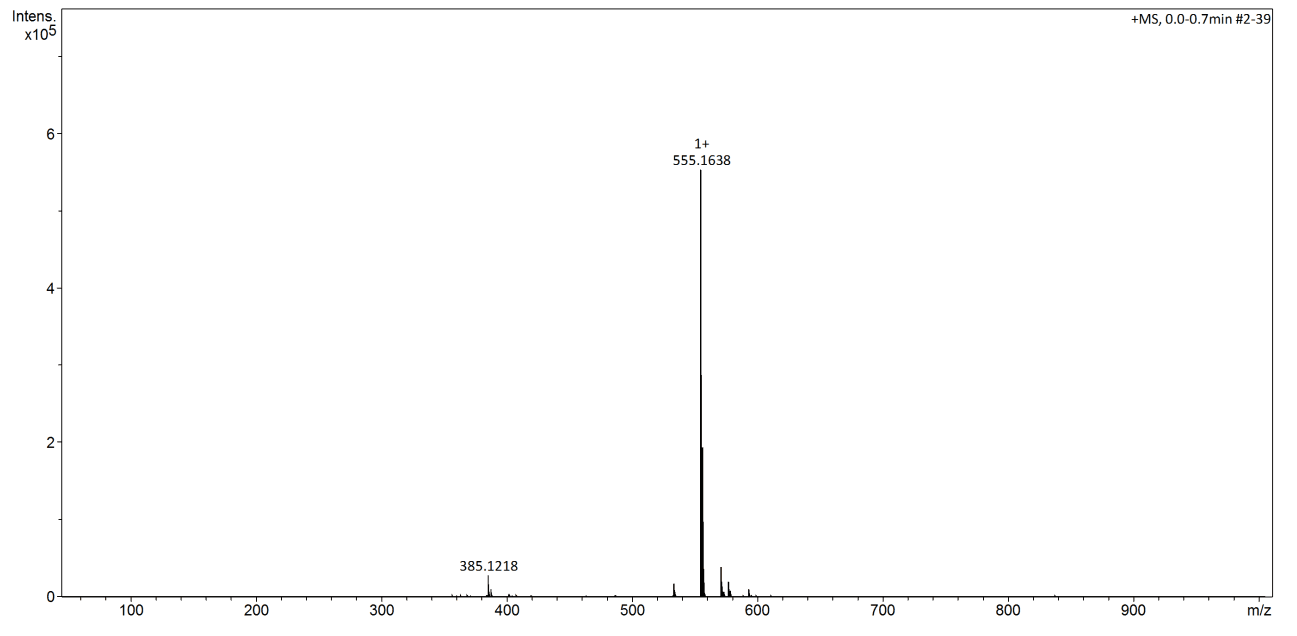


Fig. S3 ESI-MS mass spectrum of probe **NA-LCX**.

Fig. S4 The Job’s plot showed the 1: 1 complex of probe **NA-LCX** with Cu2+ ions from absorption spectra in DMSO: HEPES (3: 2, v/v) solution. The total concentration was 20 mΜ.

Fig. S5 The Stern-Volmer fitting curve of probe **NA-LCX** with different concentration of Cu2+.

Fig. S6 Fluorescence responses of probe **NA-LCX** (20 μM) upon additions of various metal ions (K+, Cr3+, Ca2+, Na+, Mg2+, Ag+, Al3+, Hg2+, Pb2+, Fe3+, Mn2+, Cd2+, Cu2+, Zn2+, Fe2+, Ni2+, Co2+) in DMSO: HEPES (3: 2, v/v) solution.

Fig. S7. Fluorescence intensity of **NA-LCX**-Cu2+ (20 μM) in DMSO:HEPES(3:2, v/v) solution upon addition of H2S in range of 1-120 μM.

Fig. S8. Fluorescence responses of probe **NA-LCX** (20 μM) upon additions of various metal ions (Co2+, Cd2+, Zn2+, Ni2+, Fe2+, Mn2+, Fe3+, Cu2+) in DMSO: HEPES (3: 2, v/v) solutions (black column) and subsequently addition of 10 equivalents of Na2S to the above solutions (red column).

| Structure | optimization method | Binding energy calculation | Binding energy | Corrected binding energy |
| --- | --- | --- | --- | --- |
| A | B3LYP/6-31G(D) | B3LYP/6-31+G(D) | -1358.83 kcal/mole | -1352.02 kcal/mole |
| B | -882.87 kcal/mole | -876.15 kcal/mole |
| C | -743.63 kcal/mole | -739.96 kcal/mole |

Fig. S9 The density functional theory (DFT) calculation of different coordination structure of **NA-LCX**-Cu2+.

Fig. S10. Variation of fluorescence intensity of probe **NA-LCX**, probe **NA-LCX** -Cu2+ and probe **NA-LCX** -Cu2+ upon addition of Na2S with pH value at room temperature.

Fig. S11. Cell viability values (%) assessed using a MTT proliferation test versus incubation concentrations of probe **NA-LCX**-Cu2+. Human liver cancer cells (HepG-2) were cultured in the presence of 0–10 μM probe **NA-LCX** 1-Cu2+ at 37oC for 24 h. Viability (%) = mean of absorbance value of treatment group/mean absorbance value of control×100%.

Scheme S1. Cartesian coordinates of different configuration of **NA-LCX**-Cu2+

**A:**

C -1.01509600 3.47953800 -0.74836500

C 0.17132700 2.81017100 -0.30391000

C 1.43099900 3.37897000 -0.69444200

C 1.46692500 4.49488500 -1.56283500

C 0.31578400 5.10481400 -2.05067400

C -0.90600200 4.59863200 -1.59849000

H 2.44332500 4.88685600 -1.83190100

H -1.83045500 5.08560500 -1.89700700

C 0.37636100 6.27620500 -3.00145700

H 0.15816800 5.96099400 -4.02932100

H -0.35519100 7.04563900 -2.73352100

H 1.36781900 6.73806300 -3.00117700

C 2.66904200 2.89792600 -0.19373400

C -2.32810800 3.14107200 -0.28535000

O 0.11538900 1.71419700 0.44452300

N 3.08970900 1.84944200 0.35358900

N -2.87319300 2.07903500 0.12828200

N -4.06301900 2.14780900 0.82907100

N 4.23255100 1.79575900 1.12743000

H -4.41458500 3.08019900 1.03876400

H 4.65947300 2.69898300 1.32378900

Cu 1.57378000 0.55642600 0.90462700

Cu -1.45231000 0.67959900 0.87024100

C -5.03894400 1.16623400 0.90361800

C 5.18931100 0.76027800 1.09319800

O -6.13572900 1.50415600 1.32240300

O 6.30901900 1.06239500 1.46640000

C -4.81514300 -0.25962500 0.46389500

C -5.92070900 -0.83718400 -0.11515200

C -3.67224100 -1.10932700 0.76077700

C -5.99370000 -2.21783300 -0.48650100

H -6.79661700 -0.21572900 -0.27523300

C -3.76320200 -2.50803000 0.43882800

C -4.88041500 -3.07240700 -0.18545500

C -7.12917000 -2.76360100 -1.10109200

H -2.90379000 -3.11736900 0.70293000

C -4.95366400 -4.45509300 -0.52051300

C -7.17461300 -4.12120600 -1.42139000

H -7.97765800 -2.12272300 -1.32356100

C -6.08514900 -4.96585600 -1.13038900

H -4.11096500 -5.10006900 -0.28820700

H -8.06035200 -4.53091700 -1.89705500

H -6.13818400 -6.01979500 -1.38419100

C 4.84804900 -0.60869000 0.60884200

C 5.85849200 -1.27726500 -0.05156900

C 3.59430600 -1.28152000 0.84945100

C 5.69851300 -2.60067600 -0.54636900

H 6.80895600 -0.77117400 -0.19403300

C 3.42109500 -2.58399600 0.35611100

C 4.44628200 -3.26754900 -0.33162100

C 6.73324700 -3.27477000 -1.23235200

H 2.47837900 -3.08118700 0.56704600

C 4.28443200 -4.59388400 -0.81728500

C 6.54522500 -4.56604700 -1.69501900

H 7.68140700 -2.76757700 -1.38918100

C 5.31334600 -5.22636300 -1.48573800

H 3.33934200 -5.10400000 -0.65118900

H 7.34749000 -5.07710100 -2.21843400

H 5.18031000 -6.24047000 -1.85068200

O 2.65119500 -0.73261200 1.59241300

O -2.59253800 -0.72364400 1.33704900

**B:**

C 1.21851000 3.68130900 0.20955700

C 0.00006100 2.91450700 0.14716900

C -1.21869900 3.68133500 0.20897800

C -1.18478000 5.08807500 0.33177500

C -0.00000100 5.82091000 0.39450300

C 1.18457000 5.08834100 0.33246500

H -2.13758700 5.60691600 0.38036800

H 2.13729700 5.60715600 0.38166400

C -0.00114200 7.32503500 0.50291500

H 0.90203900 7.68976000 0.99961600

H -0.04038400 7.78389700 -0.49268000

H -0.86771600 7.68319500 1.06572700

C -2.50081800 3.05969800 0.14485600

C 2.50042600 3.05964700 0.14571700

O -0.00001000 1.57970700 0.03340600

N -2.88184900 1.88641400 0.00279900

N 2.88203200 1.88659600 0.00327000

N 4.12413400 1.31382700 -0.02097800

N -4.12387600 1.31356100 -0.02162600

Cu 1.49255900 0.41601600 -0.08198000

Cu -1.49213600 0.41528100 -0.08204500

H -4.93256500 1.88508700 0.20658200

H 4.93265100 1.88546100 0.20748900

C 4.15416800 -0.05476600 -0.14406800

C -4.15391100 -0.05508400 -0.14437300

O -3.05949300 -0.68257400 -0.18872300

O 3.05963900 -0.68213200 -0.18856800

C -5.46997300 -0.68831600 -0.24633300

C -5.69335900 -1.99067000 0.27754600

C -6.53328800 -0.00721500 -0.88505100

C -6.98453400 -2.60410100 0.16207600

C -7.78503900 -0.58545000 -1.00764600

H -6.35802100 0.96301000 -1.33955900

C -8.03711500 -1.87866000 -0.48990300

C -7.26288200 -3.89770600 0.66288500

H -8.57951600 -0.05162500 -1.51942900

C -9.31826900 -2.47768700 -0.61010300

C -8.52961100 -4.45879900 0.53121500

H -6.50025600 -4.49577600 1.15641800

C -9.56058400 -3.74759600 -0.10549800

H -10.11155600 -1.92542700 -1.10520000

H -8.71817500 -5.45332900 0.92227500

H -10.54530900 -4.19311300 -0.20372300

O -4.67127800 -2.57480500 0.90107200

H -4.91605400 -3.44057500 1.27022400

C 5.47014500 -0.68805700 -0.24603600

C 5.69319900 -1.99083600 0.27694000

C 6.53381100 -0.00658900 -0.88386600

C 6.98442400 -2.60423100 0.16162000

C 7.78551800 -0.58482700 -1.00642700

H 6.35882400 0.96395800 -1.33777200

C 8.03731400 -1.87843100 -0.48947200

C 7.26253000 -3.89813900 0.66174900

H 8.58022000 -0.05070900 -1.51755500

C 9.31844600 -2.47748300 -0.60957900

C 8.52924300 -4.45922800 0.53020100

H 6.49972000 -4.49644300 1.15475300

C 9.56050300 -3.74770600 -0.10572000

H 10.11196300 -1.92492500 -1.10402800

H 8.71761900 -5.45401200 0.92075800

H 10.54523700 -4.19322800 -0.20387600

O 4.67085600 -2.57541200 0.89956200

H 4.91535700 -3.44160700 1.26788500

**C:**

C 1.36999700 4.25749500 -0.18941800

C 0.03594300 3.91816200 -0.61659500

C -1.07138800 4.46319800 0.07865900

C -0.85212000 5.49807800 1.03183500

C 0.43234200 5.94566300 1.33895700

C 1.53624800 5.30561800 0.76100300

H -1.71477300 5.91794700 1.54009900

H 2.54310200 5.58391800 1.05630700

C 0.64227000 7.08839500 2.30714500

H 1.50678600 6.91000500 2.95615200

H 0.82335600 8.03187600 1.77592000

H -0.23460300 7.23459600 2.94588200

C -2.29517200 3.72476200 -0.01679600

C 2.35567100 3.40427100 -0.61325500

O -0.04796800 3.03613200 -1.59840800

N -2.58888000 2.87426800 -0.90449000

N 3.25745800 2.76483700 -1.14964200

N 3.58460100 1.45341800 -0.77188800

N -3.38036900 1.74937800 -0.61950300

H 4.44884500 1.16048200 -1.20496000

H -4.12622600 1.87801600 0.05793100

C 2.67893900 0.45400600 -0.46011000

C -2.67108000 0.56670900 -0.58727300

O 1.45752800 0.71862300 -0.38672100

O -1.44980700 0.62673800 -0.89272600

C 3.27469100 -0.87100500 -0.24226900

C 4.60114000 -0.98501500 0.17555900

C 2.47700100 -2.06374800 -0.46709500

C 5.22722400 -2.23117200 0.35203100

H 5.16850200 -0.09009300 0.42048400

C 3.11767400 -3.30166000 -0.30951700
